# Supplementary material for: The use of single armed observational data to closing the gap in otherwise disconnected evidence networks: a network meta-analysis in multiple myeloma
Source: Springer Nature journal article supplement (doi:10.1186/s12874-018-0509-7), 2018-06-28
Supplement: MOESM2 [file 15892124]

## Winbugs Code

```
model{

for (i in 1:ns){                                     ### loop through number of studies ns
  delta[i,bi[i]] <- 0
  mu[i] ~ dnorm(0,0.01)
  for (k in 1:na[i]){
    r[i,k] ~ dbin(p[i,k],n[i,k])                   ### binomial likelihood function
    p[i,k] <- 1- exp(-w[i,k]*exp(loga[i,k]))       ### exponential survival to estimate log hazard
    loga[i,k] <- mu[i] + delta[i,t[i,k]]           ### estimation of log hazard ratio
  }
  for (k in 2:na[i]){
    delta[i,si[i,k]] <- d[si[i,k]] - d[bi[i]]     ### fixed effects
  }
}
d[1] <- 0
for (k in 2:nt){d[k] ~ dnorm(0,0.01) }
for (c in 1:nt) {
  for (k in 1:nt) {
    IC[c,k] <- d[c]-d[k]}                         ### estimation of pairwise comparisons
}
}
```

## Example Input data (white network)

```
WINdata<-list("r"=r, "n"=n, "t"=t, "na" = na, "nt" = nt, "ns" = ns, "bi" = bi, "si" = si, "w"=w)
```

\$r number of patients alive at time w

```
  N1 N2
[1,] 63 186
[2,] 161 162
[3,] 26 24
[4,] 160 158
[5,] 168 166
[6,] 6 8
[7,] 88 88
[8,] 88 88
[9,] 198 198
[10,] 56 54
[11,] 76 151
[12,] 57 55
[13,] 162 160
[14,] 182 180
[15,] 29 28
[16,] 142 143
```

\$n number of patients in each study arm

```
  N1 N2
[1,] 126 373
[2,] 322 324
[3,] 53 49
[4,] 320 317
[5,] 336 333
```

[6,] 12 16  
[7,] 175 176  
[8,] 176 177  
[9,] 396 396  
[10,] 113 108  
[11,] 153 302  
[12,] 114 110  
[13,] 325 321  
[14,] 363 360  
[15,] 58 57  
[16,] 283 286

**\$t treatment index of treatment given in each study arm**

T1 T2  
[1,] 1 4  
[2,] 2 6  
[3,] 2 7  
[4,] 2 8  
[5,] 1 2  
[6,] 4 9  
[7,] 1 3  
[8,] 1 3  
[9,] 3 10  
[10,] 5 11  
[11,] 1 5  
[12,] 1 12  
[13,] 3 13  
[14,] 3 14  
[15,] 3 14  
[16,] 3 15

**\$na number of arms in each study**

[1] 2 2 2 2 2 2 2 2 2 2 2 2 2 2 2 2

**\$nt number of treatments**

[1] 15

**\$ns number of studies**

[1] 16

**\$bi baseline treatment**

[1] 1 2 2 2 1 4 1 1 3 5 1 1 3 3 3 3

**\$si comparator treatment**

[,1] [,2]  
[1,] NA 4  
[2,] NA 6  
[3,] NA 7  
[4,] NA 8  
[5,] NA 2  
[6,] NA 9  
[7,] NA 3  
[8,] NA 3  
[9,] NA 10  
[10,] NA 11  
[11,] NA 5

[12,] NA 12  
[13,] NA 13  
[14,] NA 14  
[15,] NA 14  
[16,] NA 15

\$w time point of survival measure

medPFS1 medPFS2

[1,] 6.00 7.40  
[2,] 6.50 9.00  
[3,] 5.10 6.20  
[4,] 6.83 7.63  
[5,] 3.49 6.22  
[6,] 7.90 1.50  
[7,] 4.70 11.30  
[8,] 4.70 11.10  
[9,] 17.60 26.30  
[10,] 4.20 2.70  
[11,] 1.90 4.00  
[12,] 3.55 3.09  
[13,] 14.90 19.40  
[14,] 14.70 20.60  
[15,] 4.00 6.70  
[16,] 18.40 54.10
