# Supplementary material for: The use of single armed observational data to closing the gap in otherwise disconnected evidence networks: a network meta-analysis in multiple myeloma
Source: Springer Nature journal article supplement (doi:10.1186/s12874-018-0509-7), 2018-06-28
Supplement: MOESM3 [file 15892124]

## Numerical example illustrating the calculation of the distance measure between single armed studies

1. Data example :

| trial                    | treatment | prior lines<br>(median) | age<br>(median) | baseline stage<br>(mean) | female (%) |
|--------------------------|-----------|-------------------------|-----------------|--------------------------|------------|
| Avet-Loiseau et al. [54] | dex+len   | 3                       | 65              | 1.7                      | 44         |
| Fukushima et al. [56]    | bor+dex   | 2                       | 69              | 2.1                      | 41         |

2. Normalise outcomes on baseline characteristics using the assumed range of possible values and calculate absolute differences

| Trial                               | treatment | prior lines | age    | baseline stage | female (%) |
|-------------------------------------|-----------|-------------|--------|----------------|------------|
| Assumed range                       | -         | 1-4         | 20-100 | 1-3            | 0-100      |
| weight                              | -         | 4           | 3      | 2              | 1          |
| Avet-Loiseau et al. [54]            | dex+len   | 0.75        | 0.56   | 0.57           | 0.44       |
| Fukushima et al. [56]               | bor+dex   | 0.50        | 0.61   | 0.70           | 0.41       |
| $\Delta$ individual characteristics |           | 0.250       | 0.050  | 0.133          | 0.030      |

3. Calculated the weighted average as the distance measure between the two trials

$$\Delta_{tot} = \frac{4 \cdot 0.250 + 3 \cdot 0.050 + 2 \cdot 0.133 + 1 \cdot 0.030}{10} = 0.145$$
