# Supplementary material for: The use of single armed observational data to closing the gap in otherwise disconnected evidence networks: a network meta-analysis in multiple myeloma
Source: Springer Nature journal article supplement (doi:10.1186/s12874-018-0509-7), 2018-06-28
Supplement: MOESM4 [file 15892124]

## Excluded Studies

### 1. RCTs

| Study                         | Year | Reason for exclusion                                                                          |
|-------------------------------|------|-----------------------------------------------------------------------------------------------|
| <b>Dimopoulos et al. [1]</b>  | 2013 | Does not report outcome of interest                                                           |
| <b>Gertz et al. [2]</b>       | 1995 | Investigates different doses of the same intervention.                                        |
| <b>Jagannath et al. [3]</b>   | 2004 | Investigates different doses of the same intervention.                                        |
| <b>Moreau et al. [4]</b>      | 2012 | Investigates different doses of the same intervention.<br>Does not report outcome of interest |
| <b>Moreau et al. [5]</b>      | 2008 | Investigates different doses of the same intervention.<br>Does not report outcome of interest |
| <b>Richardson et al. [6]</b>  | 2006 | Investigates different doses of the same intervention.                                        |
| <b>Schey et al. [7]</b>       | 2013 | Investigates different doses of the same intervention.                                        |
| <b>Yakoub-Agha et al. [8]</b> | 2011 | Investigates different doses of the same intervention.                                        |
| <b>Zonder et al. [9]</b>      | 2015 | Does not report outcome of interest.                                                          |
| <b>Hajek et al. [10]</b>      | 2017 | Not connected to network                                                                      |

### 2. Non-RCTs

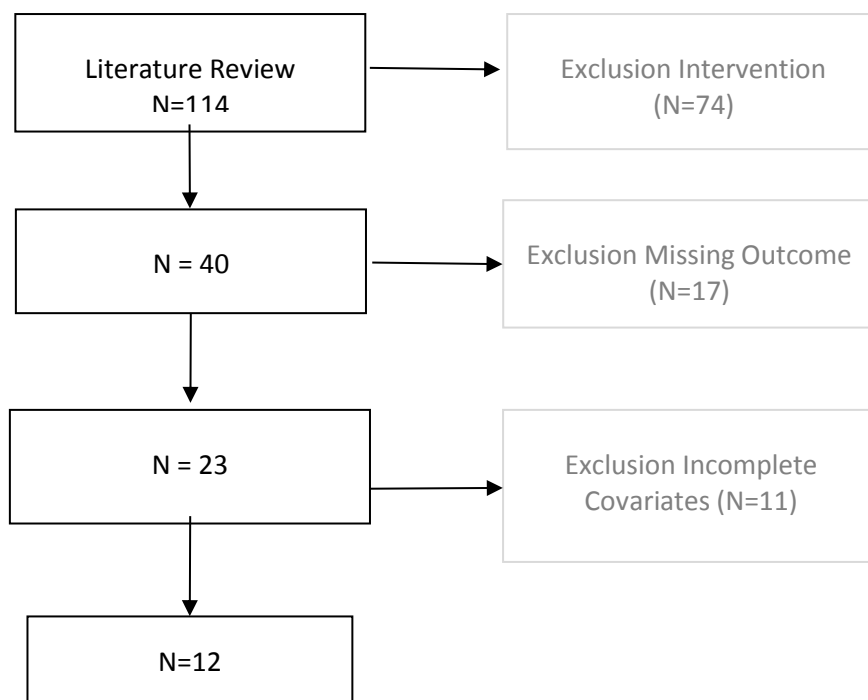

1. Dimopoulos, M.A., et al., *Phase II study of bortezomib–dexamethasone alone or with added cyclophosphamide or lenalidomide for sub-optimal response as second-line treatment for patients with multiple myeloma*. *Haematologica*, 2013. **98**(8): p. 1264-1272.
2. Gertz, M.A., et al., *Phase III study comparing vincristine, doxorubicin (Adriamycin), and dexamethasone (VAD) chemotherapy with VAD plus recombinant interferon alfa-2 in refractory or relapsed multiple myeloma. An Eastern Cooperative Oncology Group study*. *American journal of clinical oncology*, 1995. **18**(6): p. 475-480.
3. Jagannath, S., et al., *A phase 2 study of two doses of bortezomib in relapsed or refractory myeloma*. *British journal of haematology*, 2004. **127**(2): p. 165-172.
4. Moreau, P., et al., *A randomized phase II study of elotuzumab with lenalidomide and low-dose dexamethasone in patients with relapsed/refractory multiple myeloma*. 2012, American Society of Clinical Oncology.
5. Moreau, P., et al., *Prospective comparison of subcutaneous versus intravenous administration of bortezomib in patients with multiple myeloma*. *haematologica*, 2008. **93**(12): p. 1908-1911.
6. Richardson, P.G., et al., *A randomized phase 2 study of lenalidomide therapy for patients with relapsed or relapsed and refractory multiple myeloma*. *Blood*, 2006. **108**(10): p. 3458-3464.
7. Yong, K.L., et al., *Identifying an optimally effective but tolerable dose of bendamustine in combination with thalidomide and dexamethasone in patients with relapsed or refractory multiple myeloma*. 2013, Am Soc Hematology.
8. Yakoub-Agha, I., et al., *Low-dose vs. high-dose thalidomide for advanced multiple myeloma: a prospective trial from the Intergroupe Francophone du Myélome*. *European journal of haematology*, 2012. **88**(3): p. 249-259.
9. Zonder, J.A., et al., *Phase 2 study of carfilzomib (CFZ) with or without filanesib (FIL) in patients with advanced multiple myeloma (MM)*. 2015, Am Soc Hematology.
10. Hájek, R., et al., *A randomized phase III study of carfilzomib vs low-dose corticosteroids with optional cyclophosphamide in relapsed and refractory multiple myeloma (FOCUS)*. *Leukemia*, 2017. **31**(1): p. 107.
