# Supplementary material for: The use of single armed observational data to closing the gap in otherwise disconnected evidence networks: a network meta-analysis in multiple myeloma
Source: Springer Nature journal article supplement (doi:10.1186/s12874-018-0509-7), 2018-06-28
Supplement: MOESM5 [file 15892124]

## Study Quality

### (A) RCT studies

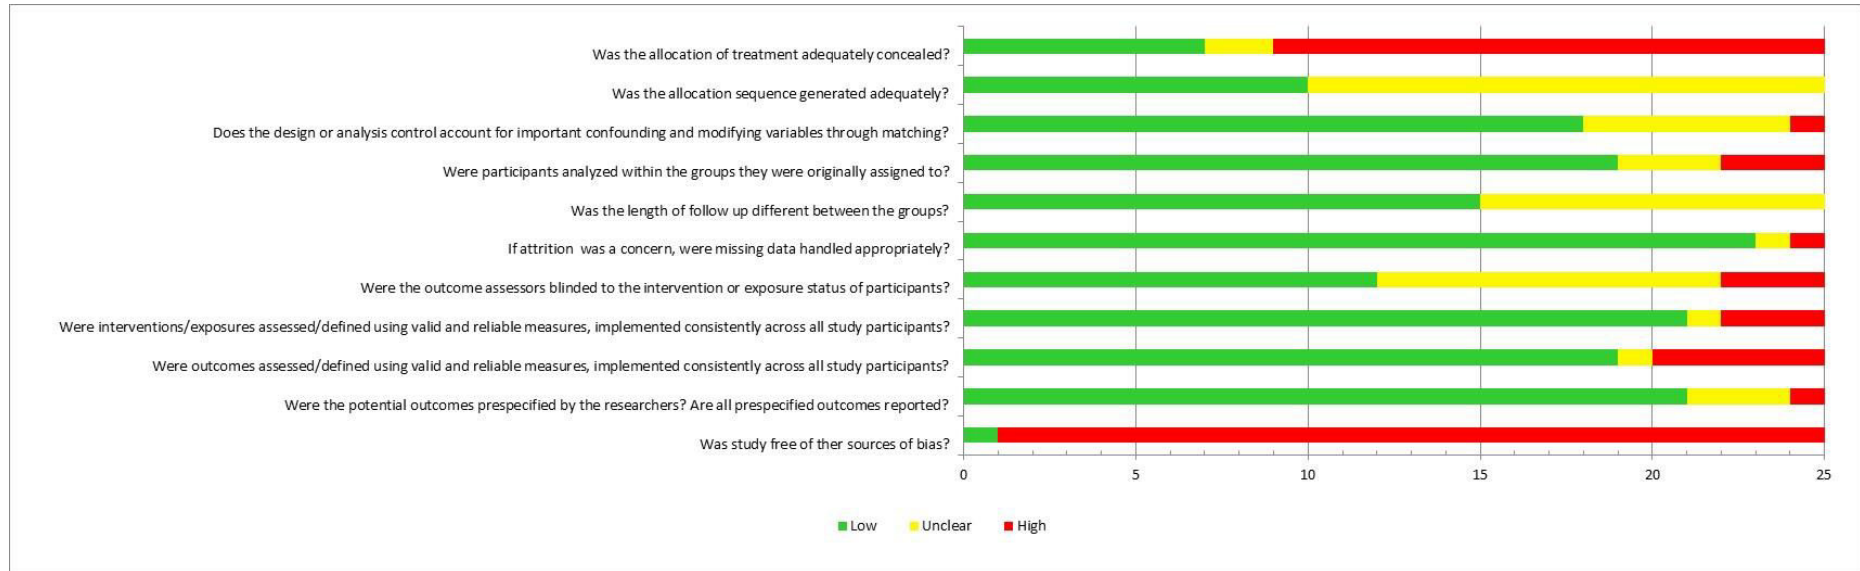

Figure 1: Cochrane Risk of Bias Assessment of Randomised Controlled Trials included in the Analysis

(B) Non-RCT studies

The quality of non-RCT studies was assessed using the Newcastle-Ottawa-Scale :

| <b>Trial name</b>                 | <b>selection</b> | <b>outcome</b> | <b>Agreed total stars / 6</b> |
|-----------------------------------|------------------|----------------|-------------------------------|
| <b>Avet-Loiseau et al. [1]</b>    | <b>**</b>        | <b>***</b>     | <b>5</b>                      |
| <b>Chang et al. [2]</b>           | <b>*</b>         | <b>***</b>     | <b>4</b>                      |
| <b>Fukushima et al. [3]</b>       | <b>*</b>         | <b>***</b>     | <b>4</b>                      |
| <b>Hou et al. [4]</b>             | <b>**</b>        | <b>***</b>     | <b>5</b>                      |
| <b>Kneppers et al. [5]</b>        | <b>**</b>        | <b>***</b>     | <b>5</b>                      |
| <b>Lacy et al. [6]</b>            | <b>**</b>        | <b>***</b>     | <b>5</b>                      |
| <b>Moore et al. [7]</b>           | <b>*</b>         | <b>***</b>     | <b>4</b>                      |
| <b>Oehrlein et al. [8]</b>        | <b>**</b>        | <b>***</b>     | <b>5</b>                      |
| <b>Pantani et al. [9]</b>         | <b>*</b>         | <b>***</b>     | <b>4</b>                      |
| <b>Richardson et al. [10]</b>     | <b>**</b>        | <b>***</b>     | <b>5</b>                      |
| <b>Terpos et al. [11]</b>         | <b>**</b>        | <b>***</b>     | <b>5</b>                      |
| <b>Walter-Croneck et al. [12]</b> | <b>**</b>        | <b>***</b>     | <b>5</b>                      |

1. Avet-Loiseau, H., et al., *Impact of high-risk cytogenetics and prior therapy on outcomes in patients with advanced relapsed or refractory multiple myeloma treated with lenalidomide plus dexamethasone*. *Leukemia*, 2010. **24**(3): p. 623.
2. Chang, H., et al., *Bortezomib therapy response is independent of cytogenetic abnormalities in relapsed/refractory multiple myeloma*. *Leukemia research*, 2007. **31**(6): p. 779-782.
3. Fukushima, T., et al., *Efficacy and safety of bortezomib plus dexamethasone therapy for refractory or relapsed multiple myeloma: once-weekly administration of bortezomib may reduce the incidence of gastrointestinal adverse events*. *Anticancer research*, 2011. **31**(6): p. 2297-2302.
4. Hou, J., et al., *A multicenter, open-label, phase 2 study of lenalidomide plus low-dose dexamethasone in Chinese patients with relapsed/refractory multiple myeloma: the MM-021 trial*. *Journal of hematology & oncology*, 2013. **6**(1): p. 1.
5. Kneppers, E., et al., *Analysis of efficacy and prognostic factors of lenalidomide treatment as part of a Dutch compassionate use program*. *Clinical Lymphoma Myeloma and Leukemia*, 2010. **10**(2): p. 138-143.
6. Lacy, M., et al., *Pomalidomide (CC4047) plus low dose dexamethasone (Pom/dex) is active and well tolerated in lenalidomide refractory multiple myeloma (MM)*. *Leukemia*, 2010. **24**(11): p. 1934-1939.
7. Moore, S., et al., *Weekly intravenous bortezomib is effective and well tolerated in relapsed/refractory myeloma*. *European journal of haematology*, 2013. **90**(5): p. 420-425.
8. Oehrlein, K., et al., *Successful treatment of patients with multiple myeloma and impaired renal function with lenalidomide: results of 4 German centers*. *Clinical Lymphoma Myeloma and Leukemia*, 2012. **12**(3): p. 191-196.
9. Pantani, L., et al., *Bortezomib and dexamethasone as salvage therapy in patients with relapsed/refractory multiple myeloma: analysis of long-term clinical outcomes*. *Annals of hematology*, 2014. **93**(1): p. 123-128.
10. Richardson, P.G., et al., *PANORAMA 2: panobinostat in combination with bortezomib and dexamethasone in patients with relapsed and bortezomib-refractory myeloma*. *Blood*, 2013. **122**(14): p. 2331-2337.
11. Terpos, E., et al., *The combination of intermediate doses of thalidomide with dexamethasone is an effective treatment for patients with refractory/relapsed multiple myeloma and normalizes abnormal bone remodeling, through the reduction of sRANKL/osteoprotegerin ratio*. *Leukemia*, 2005. **19**(11): p. 1969-1976.
12. Walter-Croneck, A., et al., *Case-adjusted bortezomib-based strategy in routine therapy of relapsed/refractory multiple myeloma shown to be highly effective—A report by Polish Myeloma Study Group*. *Leukemia research*, 2014. **38**(7): p. 788-794.
