# Supplementary material for: The use of single armed observational data to closing the gap in otherwise disconnected evidence networks: a network meta-analysis in multiple myeloma
Source: Springer Nature journal article supplement (doi:10.1186/s12874-018-0509-7), 2018-06-28
Supplement: MOESM6 [file 15892124]

Rankogram for RCT only analysis

(a) White network

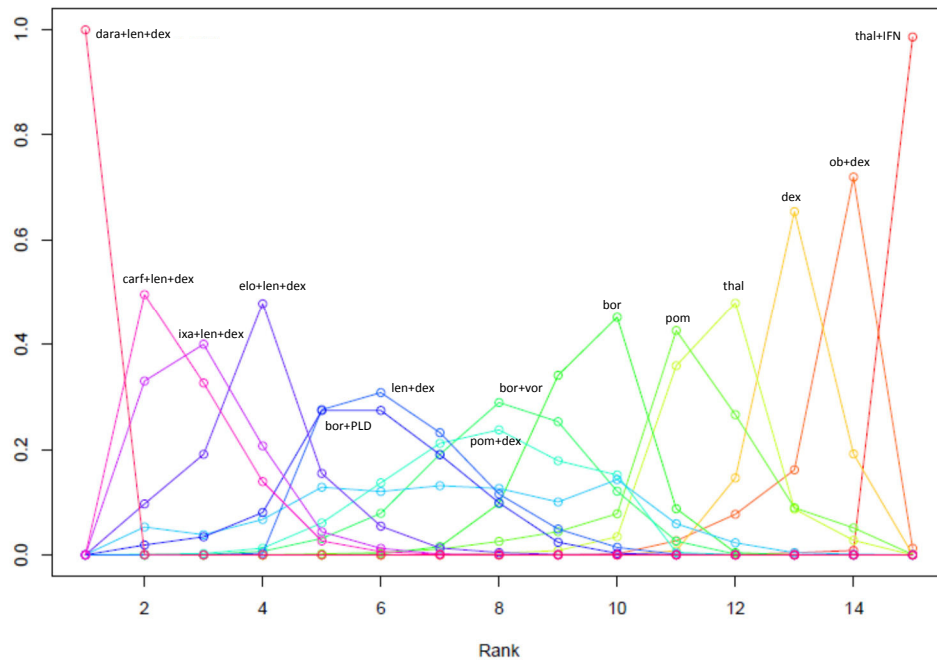

(b) Black network

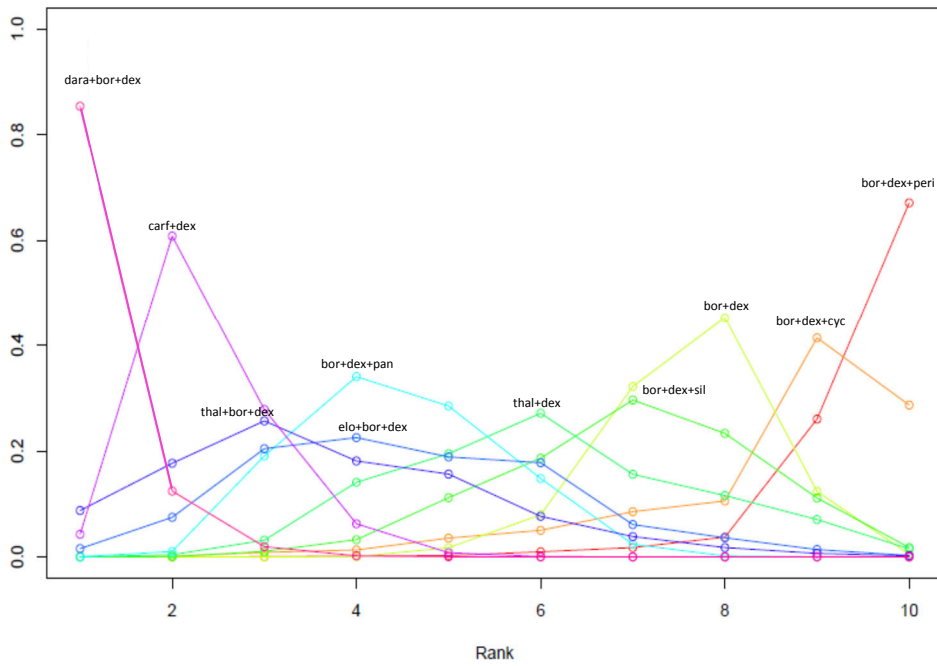

---

*Additional File 7: all pairwise comparisons*

---
