# Supplementary material for: The use of single armed observational data to closing the gap in otherwise disconnected evidence networks: a network meta-analysis in multiple myeloma
Source: BMC Med Res Methodol. 2018 Jun 28;18:66. doi: 10.1186/s12874-018-0509-7 (PMC6022299; doi:10.1186/s12874-018-0509-7)
Supplement: Supplementary file 7 — All pairwise comparisons. Table containing hazard ratios and 95% credible intervals of all pairwise comparisons in the combined analysis. (PDF 1100 kb) [file 12874_2018_509_MOESM7_ESM.pdf]

|              |  |                     |                     |                     |                     |                     |
|--------------|--|---------------------|---------------------|---------------------|---------------------|---------------------|
| pom          |  | 0.95<br>(0.55,1.66) |                     |                     |                     |                     |
| bor+dex+cyc  |  | 1.01<br>(0.48,2.15) | 0.84<br>(0.55,1.66) |                     |                     |                     |
| thal         |  |                     | 0.82<br>(0.37,1.77) | 0.77<br>(0.36,1.64) |                     |                     |
| bor+dex+peri |  |                     |                     | 0.81<br>(0.41,1.62) | 0.71<br>(0.32,1.58) | 0.67<br>(0.36,1.24) |
| dex          |  |                     |                     |                     | 0.87<br>(0.55,1.28) | 0.24<br>(0.07,0.75) |
| ob+dex       |  |                     |                     |                     |                     | 0.27<br>(0.08,0.91) |
